# Supplementary material
Source: PubMed Central journal article supplement (PMC6561349)
Supplement: NIHMS1529766-supplement-2.pdf [file NIHMS1529766-supplement-2.pdf]

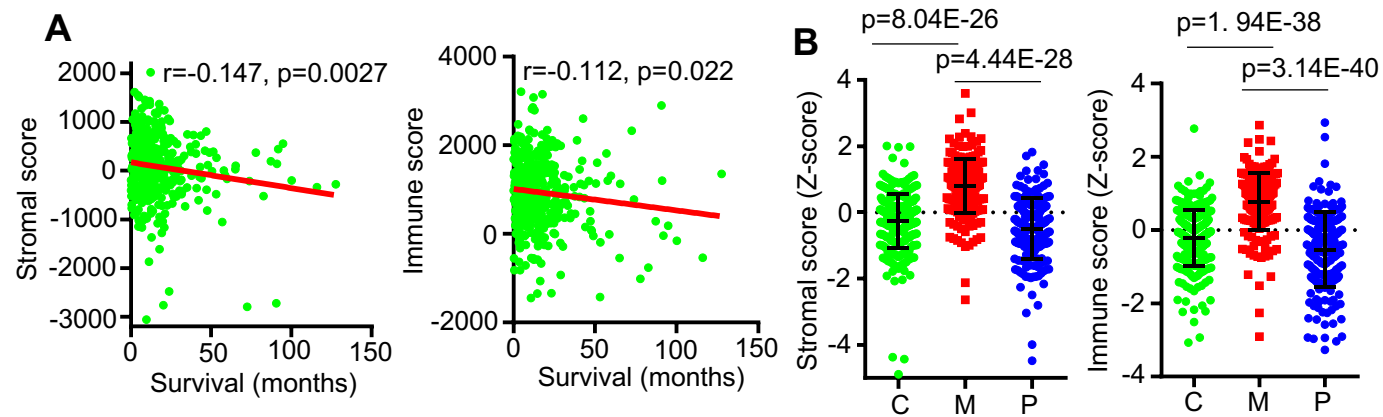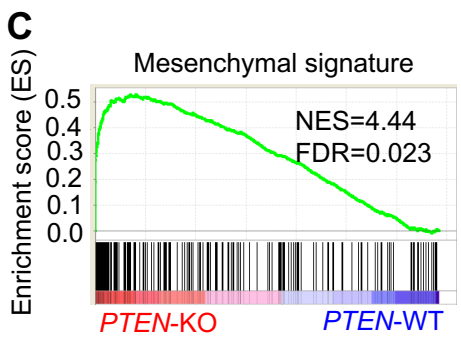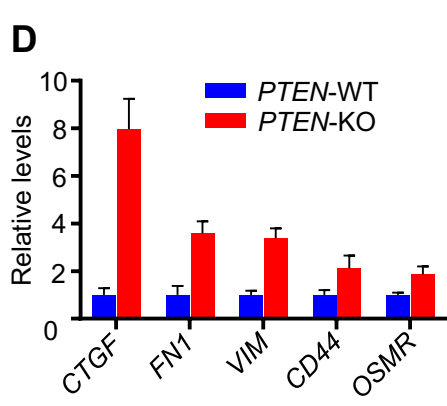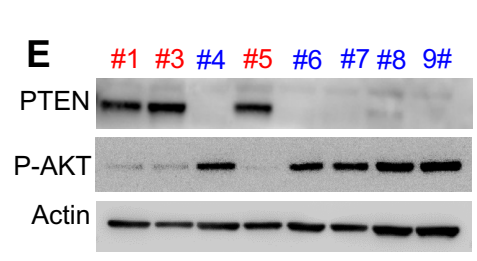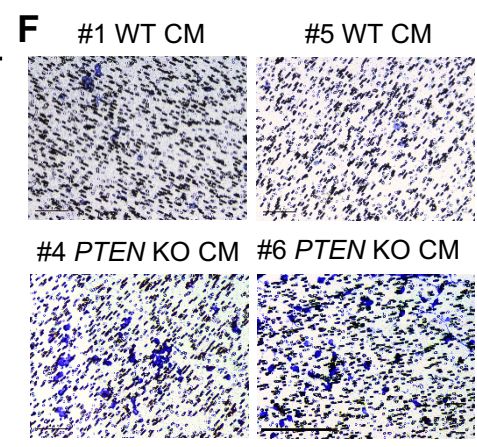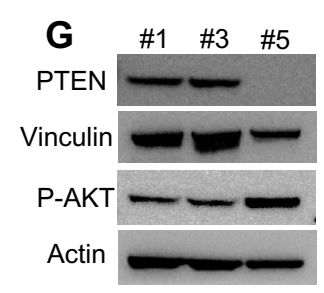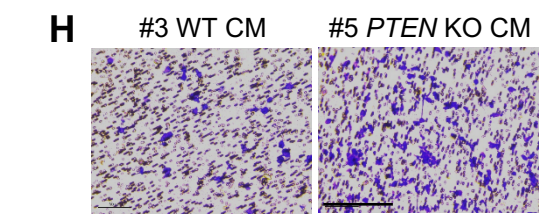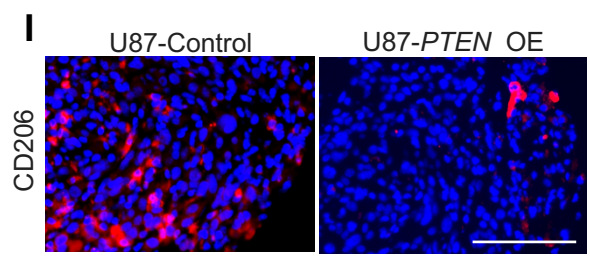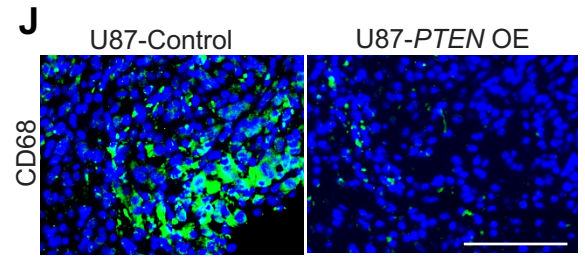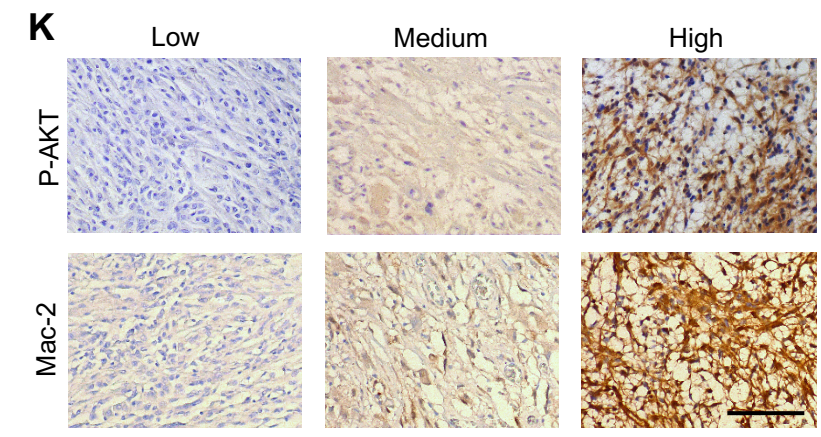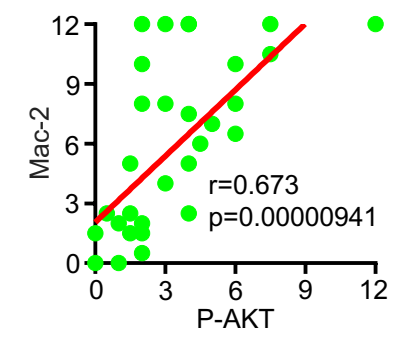

**Figure S1. *PTEN* deletion/mutation induces glioma cell mesenchymal differentiation and promotes macrophage infiltration in GBM, related to Figure 1.**

**(A)** The correlation analysis between stroma score (left panel) or immune score (right panel) and patient survival in TCGA GBM database. Pearson's correlation test.

**(B)** The stroma score (left panel) and immune score (right panel) in classical (C), mesenchymal (M) and proneural (P) patients in TCGA GBM database.

**(C)** GSEA analysis of mesenchymal gene signatures with alternatively expressed genes in *PTEN*-KO SF763 compared to *PTEN*-WT SF763 cells. NES, normalized enrichment score; FDR, false discovery rate.

**(D)** mRNA levels of *CTGF*, *FN1*, *VIM*, *CD44* and *OSMR* in *PTEN*-KO SF763 cells and *PTEN*-WT SF763 cells. n=3 biological replicates.

**(E)** Immunoblots for *PTEN* and phospho-Akt (P-AKT, Ser473) in lysates from SF763 *PTEN*-WT (#1, 3, 5) and CRISPR KO clones (#4, 6, 7, 8, 9).

**(F)** Representative transwell analysis of THP-1 macrophages following stimulation with conditioned media from *PTEN*-WT (#1 and #5) and *PTEN*-KO SF763 (#4 and #6) cells. Scale bar, 100  $\mu$ m.

**(G)** Immunoblots for *PTEN* and P-AKT (Ser473) in lysates from LN229 *PTEN*-WT (#1 and #3) and CRISPR KO clones (#5).

**(H)** Representative transwell analysis of THP-1 macrophages upon stimulation with conditioned media from *PTEN*-WT (#3) and *PTEN*-KO (#5) LN229 cells. Scale bar, 100  $\mu$ m.

**(I, J)** Representative images of CD206 (**I**) and CD68 (**J**) immunofluorescence staining in tumors established from U87 cells with or without *PTEN* overexpression (OE). Scale bar, 100  $\mu$ m.

**(K)** Left panels, representative images showing the low, medium and high expression levels of P-AKT and Mac-2 in human GBM TMA (n=35). Scale bar, 100  $\mu$ m. Right panel, correlation analysis between P-AKT and Mac-2 expression in TMA. Pearson's correlation test.

Data from multiple replicates are presented as mean. Error bars indicate mean  $\pm$  SD. Student's t test.

**Table S1.** Stroma and immune score is significantly correlated with the alteration of PTEN-PI3K pathway, but not other pathways in TCGA GBM patients, related to Figure 1.

| Stromal or immune score | Altered PTEN-PI3K pathway vs WT | Altered EGFR/PDGFR-PI3K pathway vs WT | Altered NF1-RAS-BRAF pathway vs WT | Altered RB1 pathway vs WT | Altered P53 pathway vs WT |
|-------------------------|---------------------------------|---------------------------------------|------------------------------------|---------------------------|---------------------------|
| Stromal score           | Increased, p=0.000193           | Decreased, p=0.016                    | No change, p=0.106                 | No change, p=0.111        | No change, p=0.435        |
| Immune score            | Increased, p=0.005              | No change, p=0.145                    | No change, p=0.441                 | Increased, p=0.037        | No change, p=0.435        |

**Table S2.** *PTEN*, but not *TP53* and *EGFR*, genetic alteration promotes macrophage infiltration, related to Figure 1.

| Gene sets                              | WT vs <i>PTEN</i> -deficient patients | <i>PTEN</i> -KO vs WT SF763 cells | <i>TP53</i> WT vs mutation/deletion patients | <i>EGFR</i> WT vs mutation/amplification patients |
|----------------------------------------|---------------------------------------|-----------------------------------|----------------------------------------------|---------------------------------------------------|
| Go regulation of macrophage chemotaxis | NES=-2.164;<br>FDR<0.25               | NES=2.192;<br>FDR<0.25            | NES=0.840;<br>FDR>0.25                       | NES=-0.849;<br>FDR>0.25                           |
| Go macrophage chemotaxis               | NES=-1.386;<br>FDR<0.25               | NES=2.112;<br>FDR<0.25            | NES=1.056;<br>FDR>0.25                       | NES=-0.974;<br>FDR>0.25                           |
| Macrophage gene set 1                  | N/A                                   | N/A                               | NES=1.61;<br>FDR>0.25                        | NES=-0.95;<br>FDR>0.25                            |
| Macrophage gene set 2                  | N/A                                   | N/A                               | NES=1.19;<br>FDR>0.25                        | NES=1.35;<br>FDR>0.25                             |
| M1 macrophage                          | N/A                                   | N/A                               | NES=1.51;<br>FDR>0.25                        | NES=-1.5;<br>FDR>0.25                             |
| M2 macrophages                         | N/A                                   | N/A                               | NES=1.25;<br>FDR>0.25                        | NES=0.99;<br>FDR>0.25                             |
| DC                                     | N/A                                   | N/A                               | NES=1.24;<br>FDR>0.25                        | NES=-0.84;<br>FDR>0.25                            |
| Monocytes                              | N/A                                   | N/A                               | NES=0.73;<br>FDR>0.25                        | NES=1.52;<br>FDR>0.25                             |
| Neutrophils                            | N/A                                   | N/A                               | NES=0.82;<br>FDR>0.25                        | NES=0.85;<br>FDR>0.25                             |
| Naive T Cell                           | N/A                                   | N/A                               | NES=-1.70;<br>FDR<0.25                       | NES=0.88;<br>FDR>0.25                             |
| Microglia                              | N/A                                   | N/A                               | NES=0.78;<br>FDR>0.25                        | NES=1.19;<br>FDR>0.25                             |
| HSC                                    | N/A                                   | N/A                               | NES=0.69;<br>FDR>0.25                        | NES=1.19;<br>FDR>0.25                             |
| Nuc. erythrocytes                      | N/A                                   | N/A                               | NES=0.77;<br>FDR>0.25                        | NES=0.92;<br>FDR>0.25                             |
| Eosinophils                            | N/A                                   | N/A                               | NES=0.80;<br>FDR>0.25                        | NES=-0.82;<br>FDR>0.25                            |
| T CD8 naive                            | N/A                                   | N/A                               | NES=0.51;<br>FDR>0.25                        | NES=-0.84;<br>FDR>0.25                            |
| T CD8 activated                        | N/A                                   | N/A                               | NES=1.68;<br>FDR>0.25                        | NES=1.28;<br>FDR>0.25                             |
| B Cell                                 | N/A                                   | N/A                               | NES=0.54;<br>FDR>0.25                        | NES=0.61;<br>FDR>0.25                             |
| Granulocytes                           | N/A                                   | N/A                               | NES=0.54;<br>FDR>0.25                        | NES=1.15;<br>FDR>0.25                             |
| iDC                                    | N/A                                   | N/A                               | NES=0.97;<br>FDR>0.25                        | NES=-0.9;<br>FDR>0.25                             |
| T CD4 naive                            | N/A                                   | N/A                               | NES=0.83;<br>FDR>0.25                        | NES=-0.75;<br>FDR>0.25                            |
| Mast cell                              | N/A                                   | N/A                               | NES=1.31;<br>FDR>0.25                        | NES=0.79;<br>FDR>0.25                             |
| NK cell                                | N/A                                   | N/A                               | NES=0.67;<br>FDR>0.25                        | NES=1.29;<br>FDR>0.25                             |



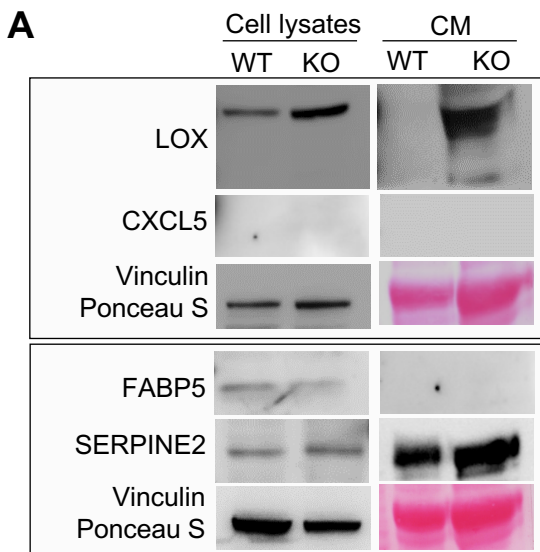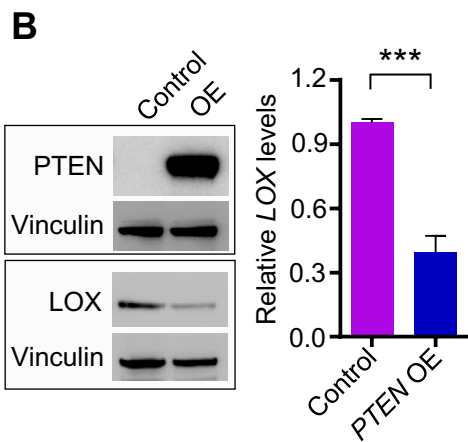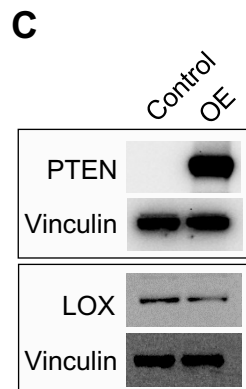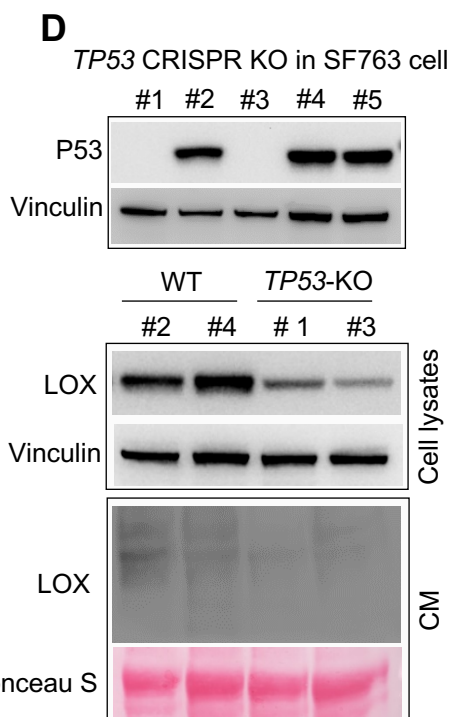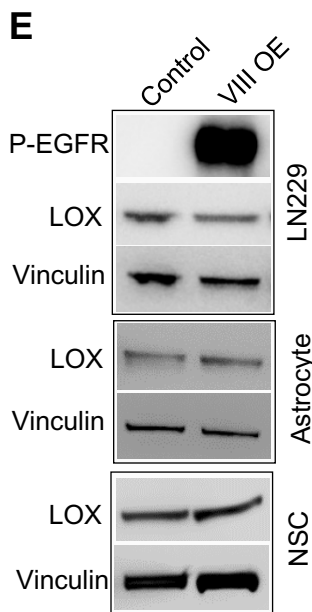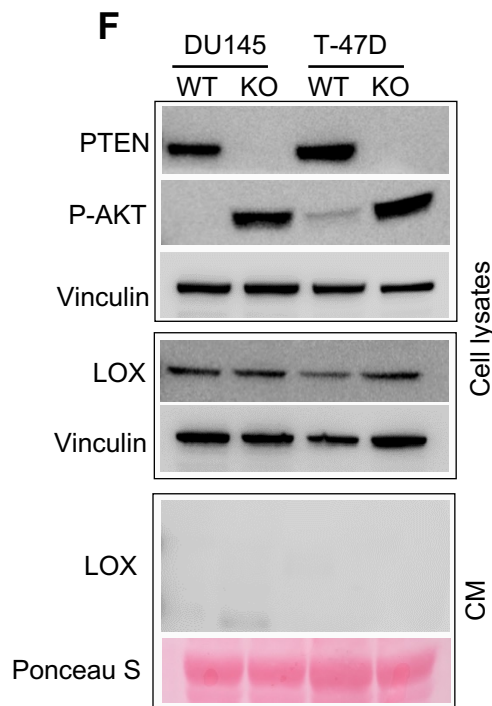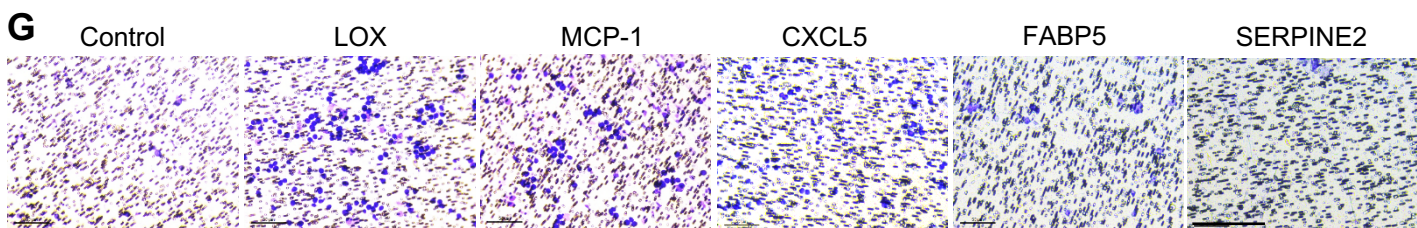

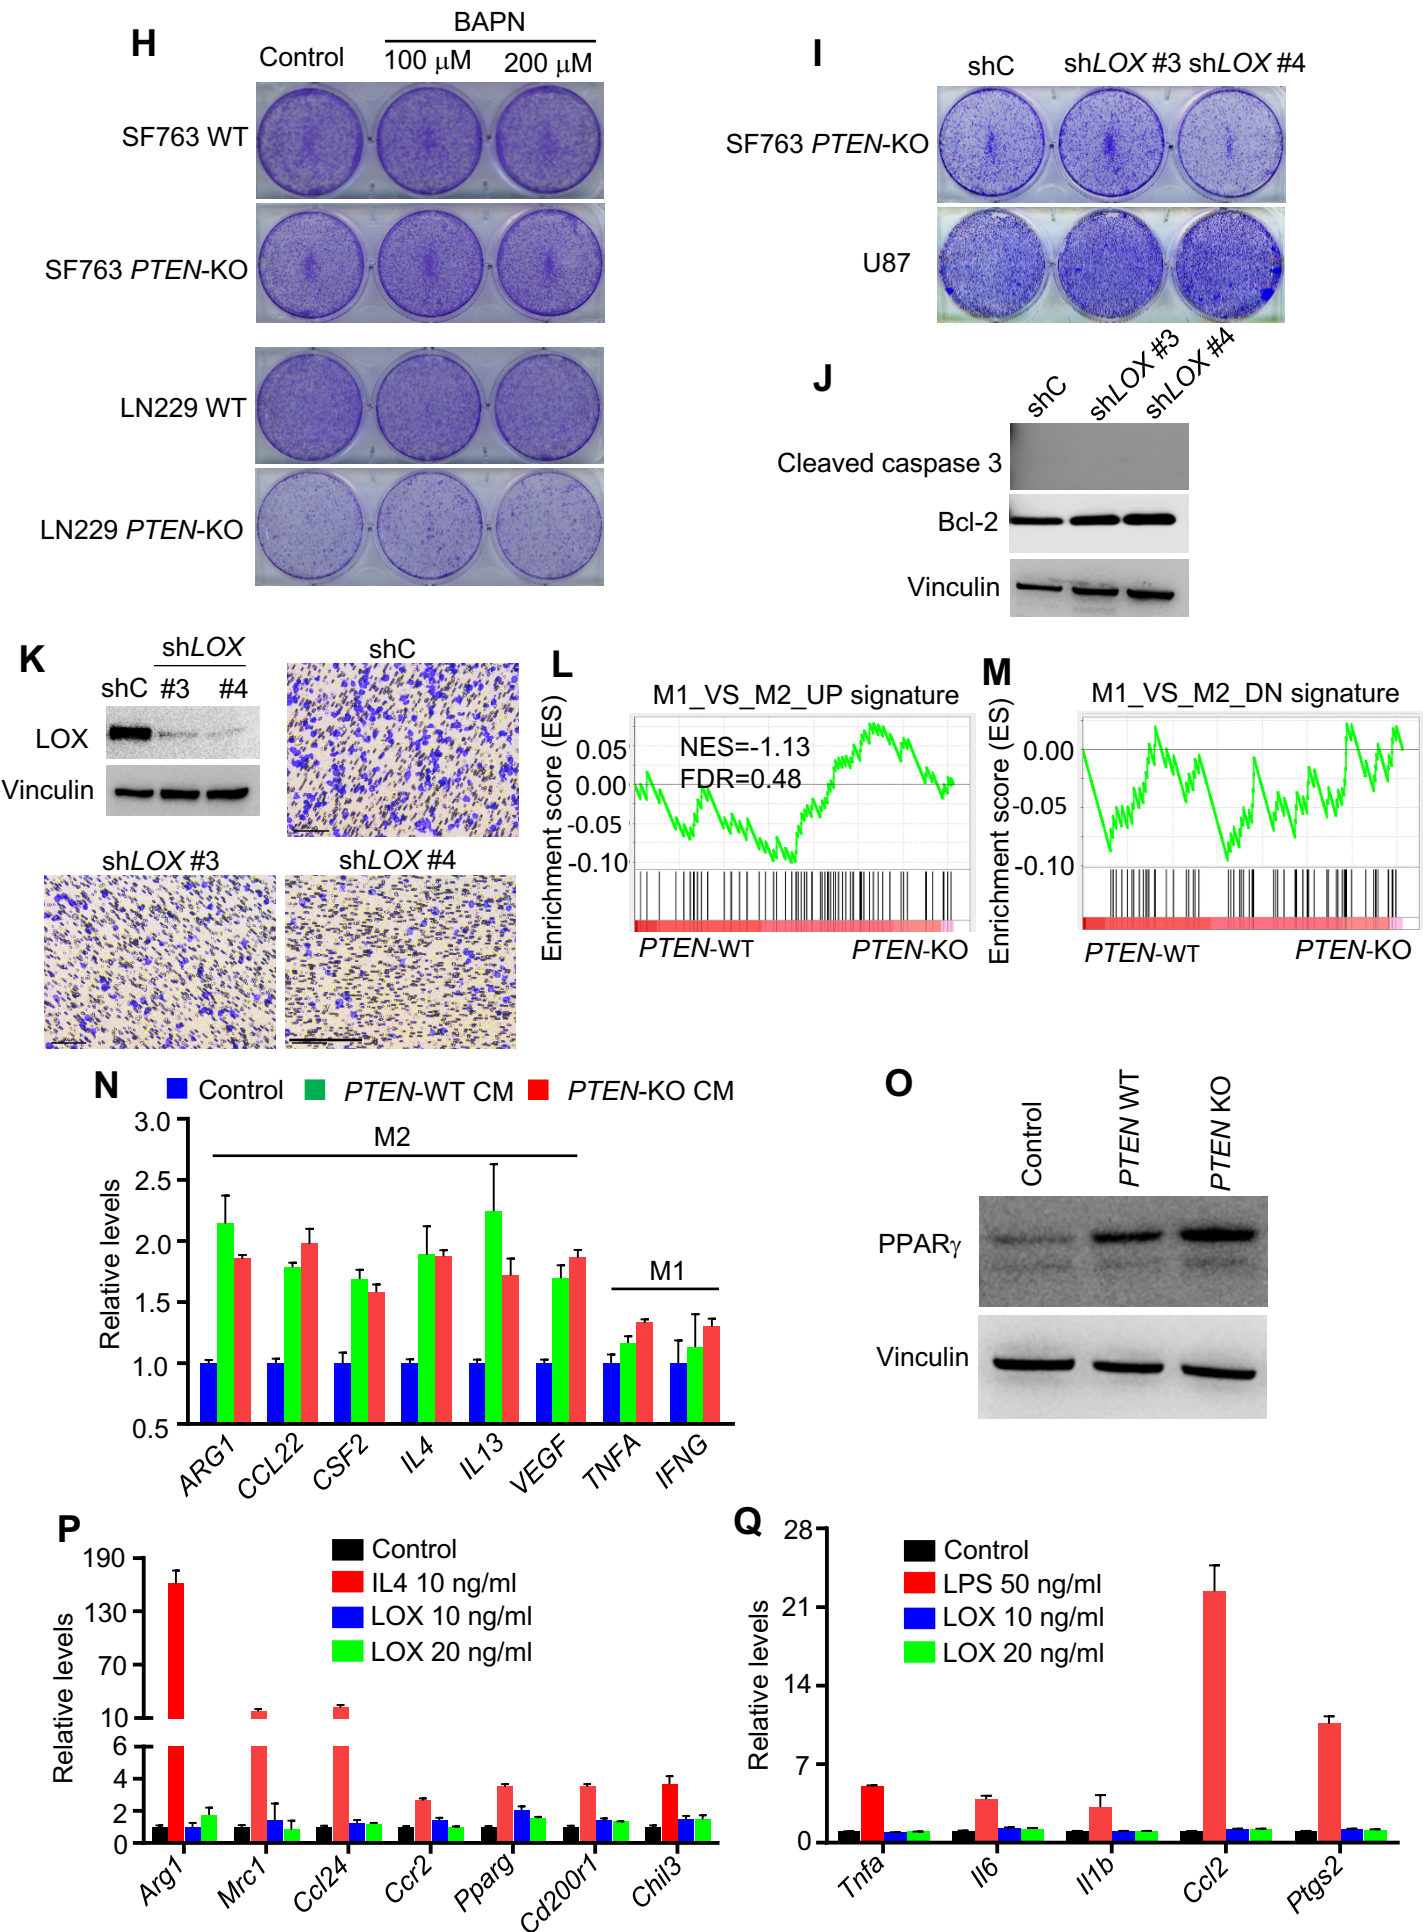

**Figure S2. *PTEN*-regulated LOX promotes macrophage migration, but has no effect on glioma cell proliferation and macrophage polarization, related to Figure 2.**

**(A)** Immunoblots for LOX, CXCL5, FABP5 and SERPINE2 in lysates and conditioned media of *PTEN*-WT and *PTEN*-KO LN229 cells.

**(B)** Immunoblots (left panel) and RT-qPCR (right panel) for LOX in control and *PTEN*-OE U251 cells. n=3 biological replicates.

**(C)** Immunoblots for LOX in control and *PTEN*-OE GSC23 cells.

**(D)** SF763 *TP53* CRISPR KO cell line establishment and immunoblots of LOX in SF763 *TP53*-WT (#2 and #4) and SF763 *TP53*-KO (#1 and #3) cells (top 2 panels) and their respective conditioned media (bottom 2 panels).

**(E)** *EGFRvIII* overexpression (VIII OE) in LN229 cells, astrocytes or NSCs and immunoblots of LOX in control and VIII overexpressing cells.

**(F)** Immunoblots of LOX in *PTEN*-WT and *PTEN* CRISPR KO prostate (DU145) and breast (T-47D) cells and their conditioned media (bottom 2 panels).

**(G)** Representative macrophage transwell analysis when THP-1 cells were stimulated with recombinant LOX, MCP-1, CXCL5, FABP5 and SERPINE2 proteins (10 ng/ml). Scale bar, 100  $\mu$ m.

**(H)** Colony formation assay in SF763 and LN229 (*PTEN*-WT and *PTEN* CRISPR KO) cells treated without or with the LOX inhibitor BAPN at indicated concentrations.

**(I)** Colony formation assay in SF763 *PTEN*-KO and U87 cells expressing shControl (shC) or LOX shRNA (shLOX).

**(J)** Immunoblots for cleaved caspase 3 and Bcl-2 in U87 cells expressing shC or shLOX.

**(K)** Representative shRNA knockdown efficiency and THP-1 macrophage transwell analysis of migrated macrophages following stimulation with conditioned media from SF763 *PTEN*-KO cells expressing shC or shLOX. Scale bar, 100  $\mu$ m.

**(L, M)** GSEA analysis for two gene sets related macrophage polarization in *PTEN*-WT GBM patients compared with *PTEN*-deficient GBM patients in TCGA GBM database.

**(N)** RT-qPCR for indicated M2 genes and M1 genes in PMA-differentiated macrophages treated with or without CM from parental SF763 and *PTEN*-KO SF763 cells.

**(O)** Immunoblots for PPAR $\gamma$  in PMA-differentiated macrophages treated with or without CM from parental SF763 and *PTEN*-KO SF763 cells.

**(P)** RT-qPCR for M2 genes in Raw264.7 macrophages treated with IL4 or LOX at indicated concentrations.

**(Q)** RT-qPCR for M1 genes in Raw264.7 macrophages treated with LPS or LOX at indicated concentrations.

Data from multiple replicates are presented as mean. Error bars indicate mean  $\pm$  SD. \*\*\* $p < 0.001$ , Student's t test.

**Table S3.** A list of the secreted proteins differentially expressed by *PTEN*-KO SF763 cells relative to *PTEN*-WT SF763 cells (Fold change>2), related to Figure 2.

| Gene Symbol     | Fold Change (linear) (KO vs. WT) | ANOVA p-value (KO vs. WT) | FDR p-value (KO vs. WT) | Description                                                                                   | Chromosome |
|-----------------|----------------------------------|---------------------------|-------------------------|-----------------------------------------------------------------------------------------------|------------|
| <i>CXCL5</i>    | 313.22                           | 0.000141                  | 0.116083                | chemokine (C-X-C motif) ligand 5                                                              | chr4       |
| <i>SEMA3E</i>   | 63.21                            | 0.000339                  | 0.136366                | sema domain, immunoglobulin domain (Ig), short basic domain, secreted, (semaphorin) 3E        | chr7       |
| <i>DAB2</i>     | 41.52                            | 0.000293                  | 0.132902                | Dab, mitogen-responsive phosphoprotein, homolog 2 ( <i>Drosophila</i> )                       | chr5       |
| <i>LOX</i>      | 37.71                            | 0.000922                  | 0.177276                | lysyl oxidase                                                                                 | chr5       |
| <i>SERPINE2</i> | 25.16                            | 0.005712                  | 0.29061                 | serpin peptidase inhibitor, clade E (nexin, plasminogen activator inhibitor type 1), member 2 | chr2       |
| <i>SERPINB2</i> | 19.24                            | 0.05556                   | 0.560525                | serpin peptidase inhibitor, clade B (ovalbumin), member 2                                     | chr18      |
| <i>SPP1</i>     | 12.81                            | 0.006714                  | 0.308489                | secreted phosphoprotein 1                                                                     | chr4       |
| <i>FABP5</i>    | 12.04                            | 0.000047                  | 0.088937                | fatty acid binding protein 5 (psoriasis-associated)                                           | chr8       |
| <i>VEGFC</i>    | 9.67                             | 0.004761                  | 0.277937                | vascular endothelial growth factor C                                                          | chr4       |
| <i>CTGF</i>     | 7.94                             | 0.014545                  | 0.384372                | connective tissue growth factor                                                               | chr6       |
| <i>TNC</i>      | 7.39                             | 0.007705                  | 0.319189                | tenascin C                                                                                    | chr9       |
| <i>CSF1</i>     | 7.28                             | 0.00454                   | 0.27429                 | colony stimulating factor 1 (macrophage)                                                      | chr1       |
| <i>LCN2</i>     | 5.9                              | 0.009123                  | 0.338539                | lipocalin 2                                                                                   | chr9       |
| <i>GAL</i>      | 4.57                             | 0.007818                  | 0.321112                | galanin/GMAP prepropeptide                                                                    | chr11      |
| <i>COL6A1</i>   | 3.97                             | 0.001605                  | 0.206285                | collagen, type VI, alpha 1                                                                    | chr21      |
| <i>CCL5</i>     | 3.43                             | 0.028477                  | 0.46741                 | chemokine (C-C motif) ligand 5                                                                | chr17      |
| <i>IGF2</i>     | 2.6                              | 0.047455                  | 0.537892                | insulin-like growth factor 2                                                                  | chr11      |
| <i>IL6</i>      | 2.55                             | 0.054825                  | 0.559328                | interleukin 6                                                                                 | chr7       |
| <i>ADM</i>      | 2.54                             | 0.003047                  | 0.245175                | adrenomedullin                                                                                | chr11      |
| <i>CKLF</i>     | 2.37                             | 0.000575                  | 0.154231                | chemokine-like factor; CKLF-CMTM1 readthrough                                                 | chr16      |

**Table S4.** Computational analysis demonstrates a key role of LOX for myeloid/leukocyte migration in TCGA GBM patients, related to Figure 2.

| Top ten enriched pathways | Gene Ontology Enrichment Analysis          |                                            |                                    | KEGG Enrichment Analysis                             |
|---------------------------|--------------------------------------------|--------------------------------------------|------------------------------------|------------------------------------------------------|
|                           | Cell Compartment                           | Biological Process                         | Molecular Function                 |                                                      |
| #1                        | Extracellular matrix                       | Leukocyte migration                        | Cytokine activity                  | Cytokine-cytokine receptor interaction               |
| #2                        | Proteinaceous extracellular matrix         | Cell chemotaxis                            | Cytokine receptor binding          | TNF signaling pathway                                |
| #3                        | Secretory granule                          | Leukocyte chemotaxis                       | G-protein coupled receptor binding | Chemokine signaling pathway                          |
| #4                        | Endoplasmic reticulum lumen                | Myeloid leukocyte migration                | Glycosaminoglycan binding          | AGE-RAGE signaling pathway in diabetic complications |
| #5                        | Extracellular matrix component             | Granulocyte migration                      | Sulfur compound binding            | IL-17 signaling pathway                              |
| #6                        | Collagen trimer                            | Regulation of leukocyte migration          | Heparin binding                    | Complement and coagulation cascades                  |
| #7                        | Vesicle lumen                              | Granulocyte chemotaxis                     | Chemokine receptor binding         | Amoebiasis                                           |
| #8                        | Cytoplasmic membrane-bounded vesicle lumen | Positive regulation of leukocyte migration | Chemokine activity                 | Rheumatoid arthritis                                 |
| #9                        | Secretory granule lumen                    | Neutrophil migration                       | Serine-type endopeptidase activity | Protein digestion and absorption                     |
| #10                       | Complex of collagen trimer                 | Neutrophil chemotaxis                      | CCR chemokine receptor binding     | Staphylococcus aureus infection                      |



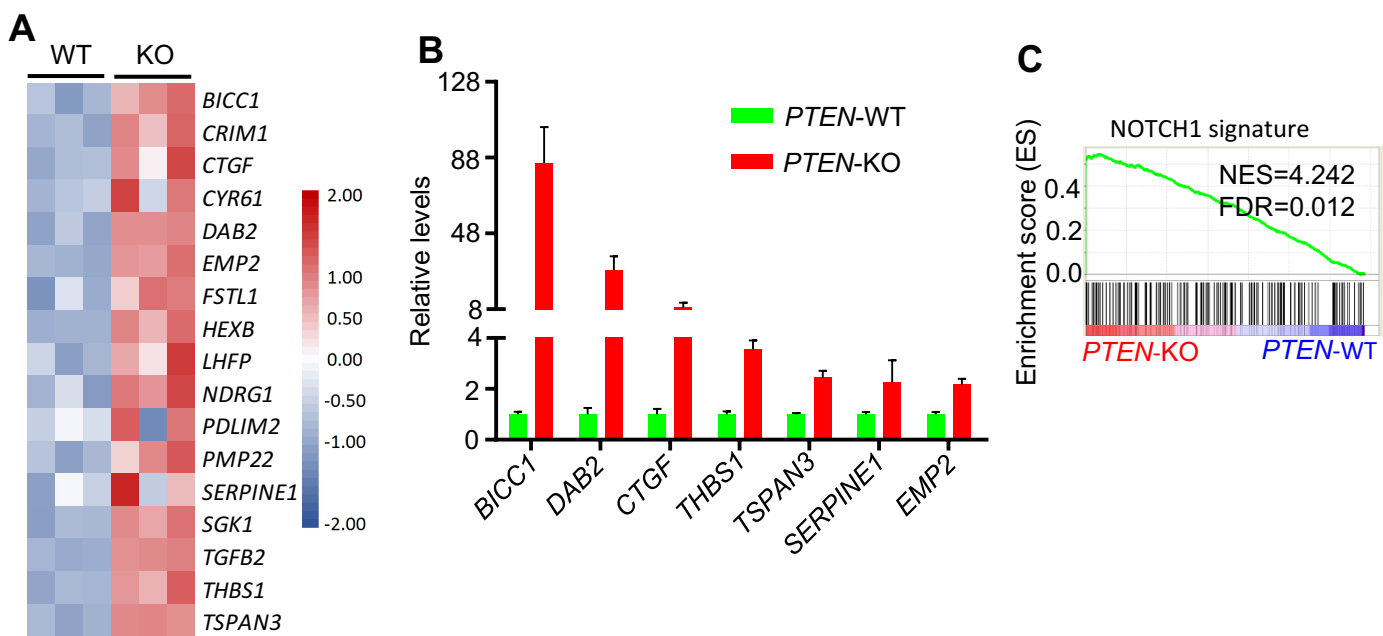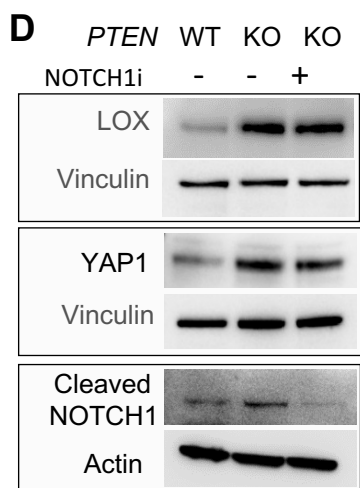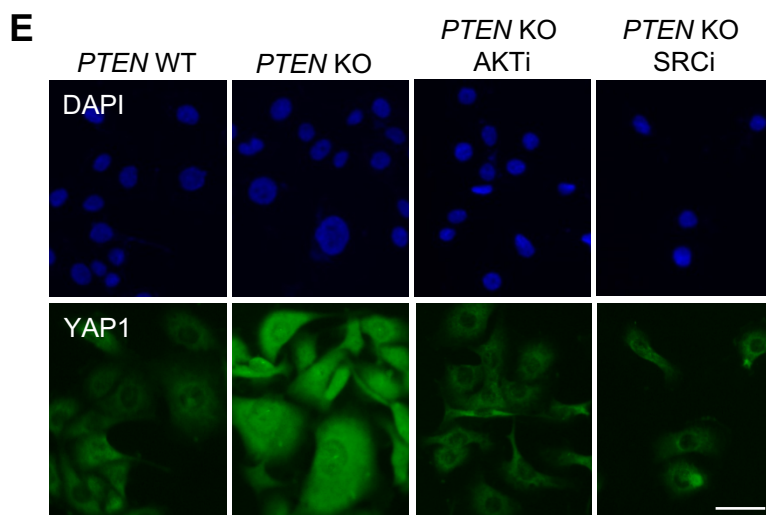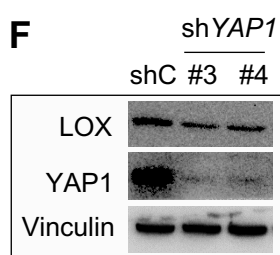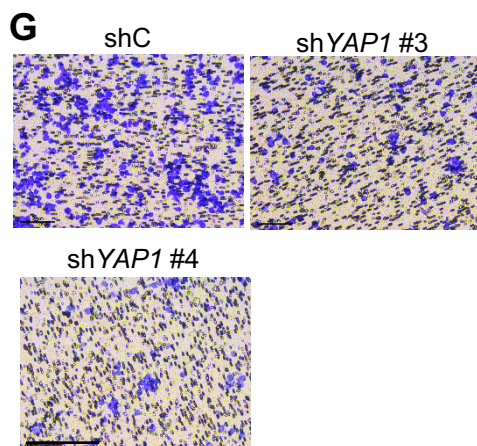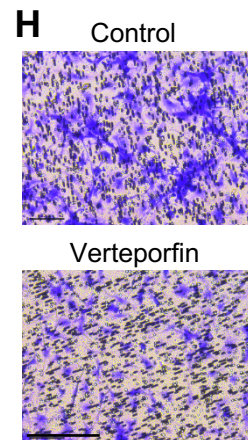

**Figure S3. SRC/AKT-YAP1, but not NOTCH1, regulates LOX expression and macrophage migration in GBM, related to Figure 3.**

**(A)** Heat map representation of the 17 most upregulated *YAP1* signature genes in SF763 *PTEN*-KO cells. Red signal indicates higher expression and blue signal denotes lower expression.

**(B)** RT-qPCR validation of key genes in *YAP1* signature in SF763 *PTEN*-WT and *PTEN* CRIPSR-KO cells. n=3 biological replicates. Error bars indicate mean  $\pm$  SD.

**(C)** GSEA for NOTCH1 signature in *PTEN*-KO cells vs *PTEN*-WT SF763 cells.

**(D)** Immunoblots of LOX, YAP1, cleaved NOTCH1 in *PTEN*-WT and *PTEN*-KO SF763 cells treated with or without NOTCH1 inhibitor (NOTCH1i) LY3039478 (1  $\mu$ M).

**(E)** Immunofluorescence for YAP1 in *PTEN*-WT and *PTEN*-KO SF763 cells treated with or without SRC inhibitor (SRCi) KX2-391 (50 nM) and AKT inhibitor (AKTi) MK2206 (2  $\mu$ M). Scale bar, 50  $\mu$ m.

**(F)** Immunoblots of LOX and YAP1 in U251 *PTEN*-null GBM cell lines expressing shC or sh*YAP1*.

**(G)** Representative transwell analysis of THP-1 macrophages following stimulation with conditioned media from U343 cells expressing shC or sh*YAP1*. Scale bar, 100  $\mu$ m.

**(H)** Representative transwell analysis of BMDMs following stimulation with conditioned media from SF763 *PTEN*-KO cells pretreated with verteporfin (1  $\mu$ M). Scale bar, 100  $\mu$ m.

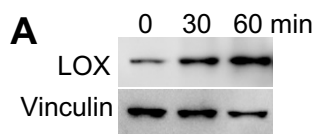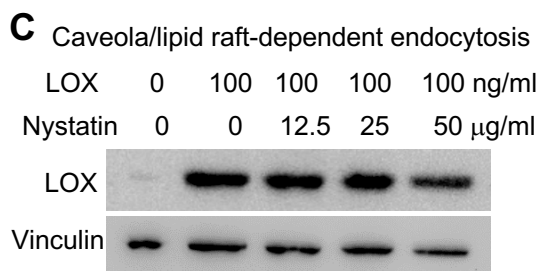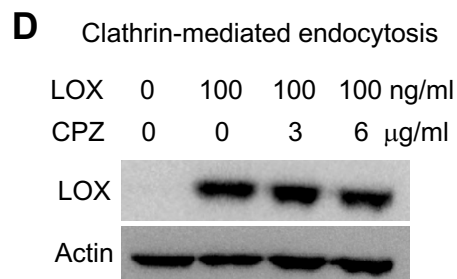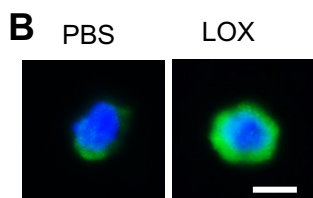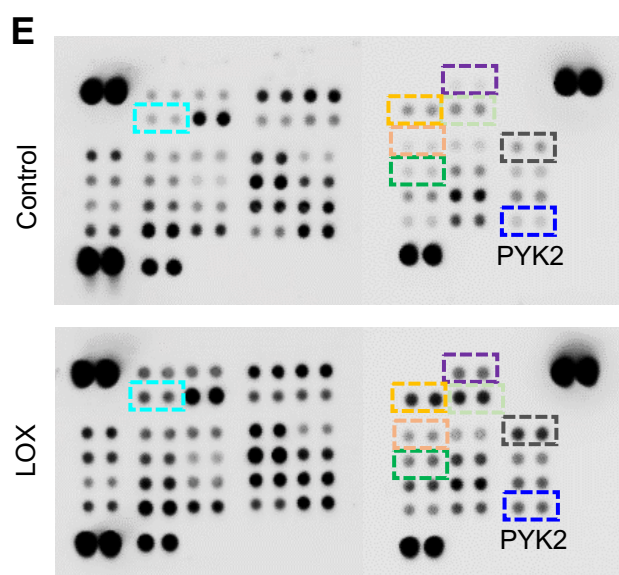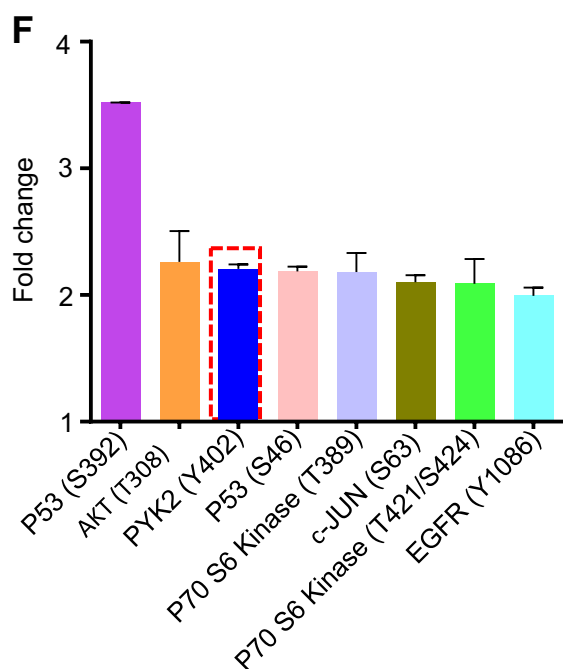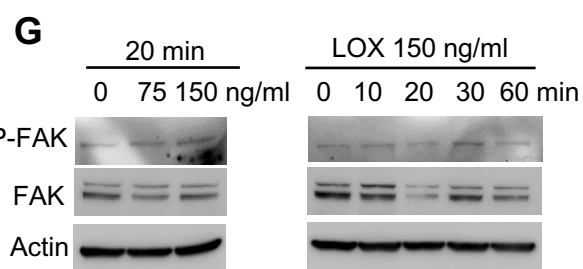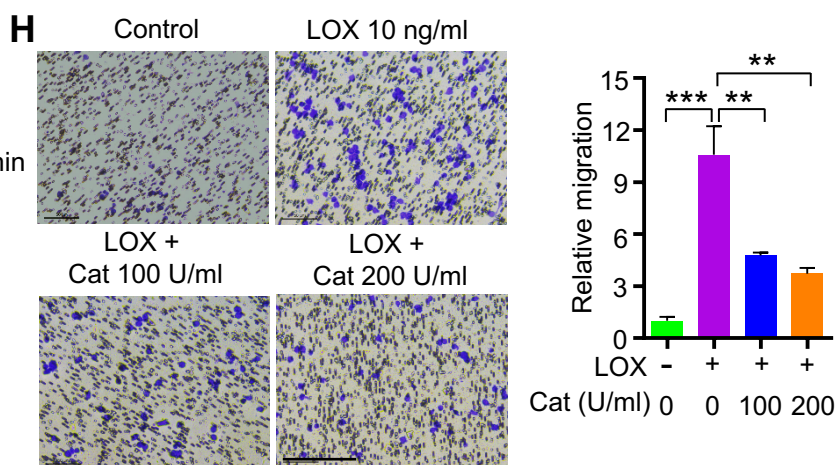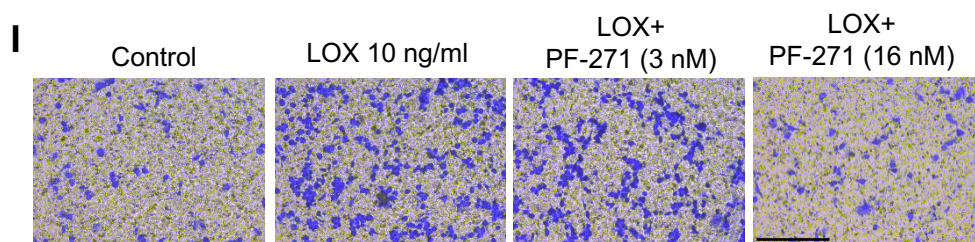

**Figure S4. LOX can be internalized into macrophages and promote macrophage migration through PYK2 pathway, related to Figure 4.**

**(A)** Immunoblots of LOX in J714 macrophages incubated with recombinant LOX (100 ng/ml) for indicated time. The cell surface binding of LOX was removed by washing with acid buffer.

**(B)** Representative immunofluorescence for LOX in J714 macrophages incubated with or without recombinant LOX (100 ng/ml) for 1 hr. Scale bar, 10  $\mu$ m.

**(C, D)** Immunoblots of LOX in Raw264.7 macrophages incubated with recombinant LOX (100 ng/ml) for 1 hr pretreated with or without the inhibitors of the caveola/lipid raft pathway (nystatin, **C**) or the clathrin-dependent pathway (chlorpromazine, CPZ, **D**) at indicated concentrations. The cell surface binding of LOX was removed by washing with acid buffer.

**(E)** Representative images for human phospho-kinase array in human THP-1 macrophages treated with or without LOX protein (150 ng/ml). Kinases with more than a 2-fold change are marked.

**(F)** Relative levels (fold change of phosphorylation levels) of indicated signals in human THP-1 macrophages treated with or without human LOX protein (150 ng/ml). The cut-off was set as 2. Error bars indicate SD.

**(G)** Immunoblots for Phospho-FAK and FAK in Raw264.7 macrophages treated with LOX at indicated concentrations and time points.

**(H)** Representative THP-1 macrophage transwell analysis (left panels) and quantification (right panel) of migrated macrophages when they stimulated with LOX (10 ng/ml) pretreated with or without catalase (Cat) at indicated concentrations. Scale bar, 100  $\mu$ m. n=3 biological replicates; Error bars indicate mean  $\pm$  SD. \*\*p<0.01, \*\*\*p<0.001, Student's t test.

**(I)** Representative transwell analysis of Raw264.7 macrophage following stimulation with LOX (10 ng/ml) pretreated with or without PF-00562271 (PF-271) at indicated concentrations. Scale bar, 100  $\mu$ m.

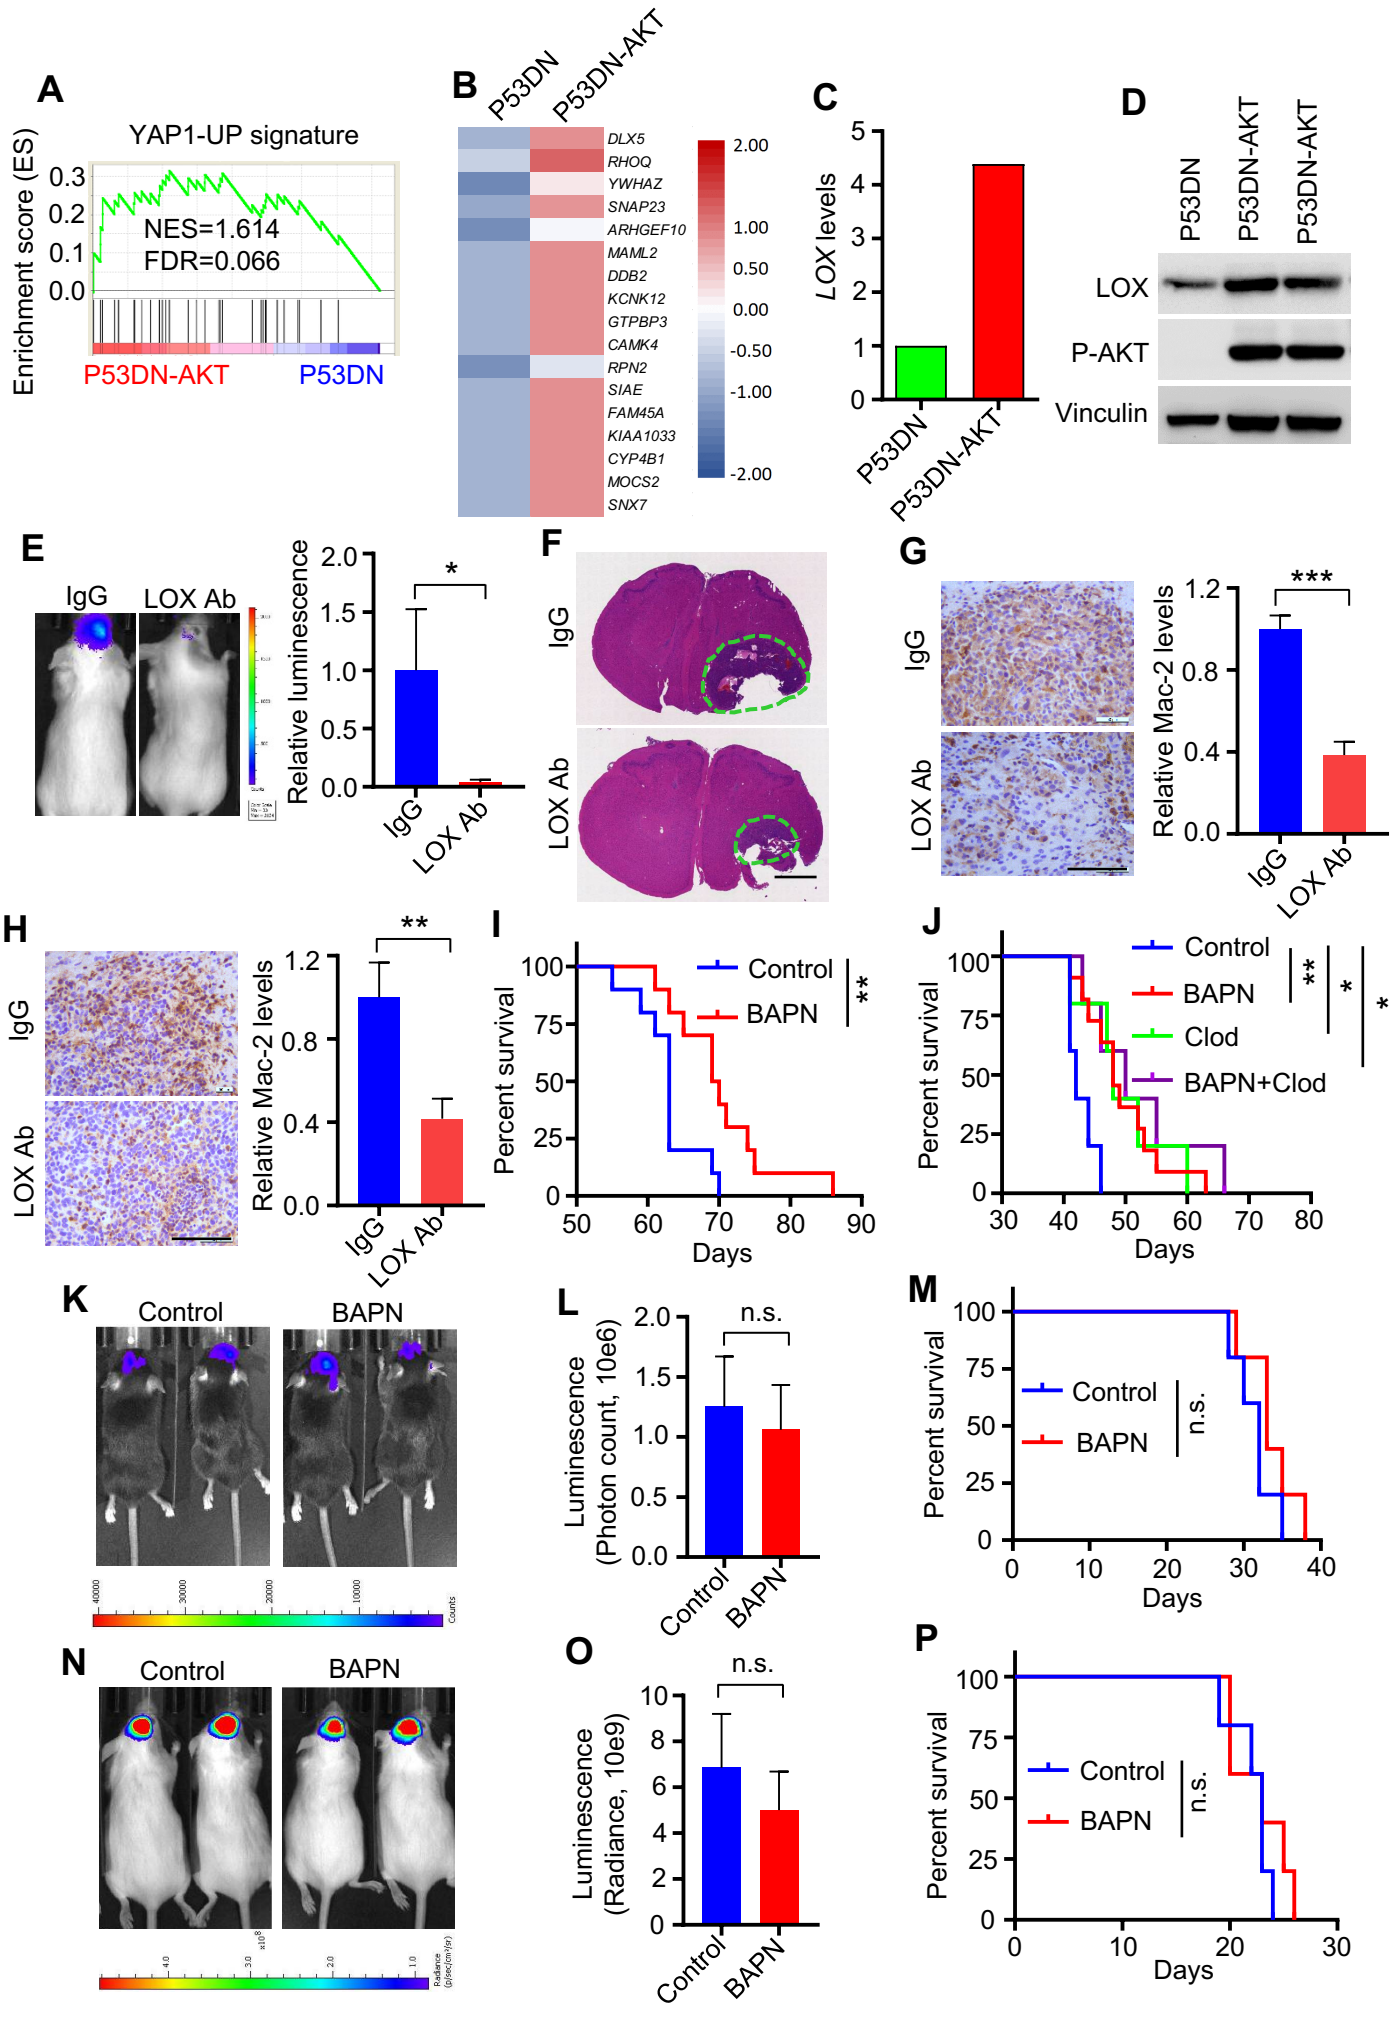



**Figure S5. LOX Inhibition impairs *PTEN*-null GBM growth and progression, related to Figure 5.**

**(A)** GSEA for *YAP1* signature in P53DN-AKT-hNSCs comparing to P53DN-hNSCs.

**(B)** Heatmap of key gene expression of *YAP1* signature in P53DN-hNSCs and P53DN-AKT-hNSCs.

**(C, D)** *LOX* mRNA **(C)** and *LOX* protein expression **(D)** in P53DN-hNSCs and P53DN-AKT-hNSCs.

**(E)** Representative (left panels) and quantification (right panel) of *in vivo* bioluminescence-based images of SCID mice at day 17 post-orthotopic injection of U87 ( $5 \times 10^5$  cells). The mice were treated with IgG or LOX antibodies (20 mg/kg body weight, once every 4 days) starting at 4 days post-orthotopic injection of U87 cells.

**(F)** Representative images of H&E staining (Scale bar, 1000  $\mu\text{m}$ ) in tumors at 22 days post-orthotopic injection of 005 GSCs ( $2 \times 10^4$  cells). The mice were treated with IgG or LOX antibodies (20 mg/kg body weight, once every 4 days) starting at 4 days post-orthotopic injection of 005 GSC (n=5/group).

**(G)** IHC (left panel) and quantification (right panel) of macrophage marker Mac-2 in U87 tumors treated with IgG or LOX antibodies. Scale bar, 100  $\mu\text{m}$ . n=3 biological replicates.

**(H)** IHC staining (left panel) and quantification (right panel) of Mac-2 in 005 GSC tumors treated with IgG or LOX antibodies. Scale bar, 100  $\mu\text{m}$ . n=3 biological replicates.

**(I)** Survival curves of SCID mice implanted with GSC23 ( $1 \times 10^5$  cells). Mice were treated with or without LOX inhibitor BAPN (2 g/L in drinking water) starting at 7 days post-orthotopic injection of GSC23 (n=10/group).

**(J)** Survival curves of mice implanted with 005 GSCs ( $2 \times 10^4$  cells). Mice were treated with LOX inhibitor BAPN (2 g/L in drinking water), or clodronate liposomes (200  $\mu\text{l}$ , once every 3 days) starting at 4 days post-orthotopic injection of 005 GSCs (n=5-10/group).

**(K, L)** *In vivo* bioluminescence-based images 11 days post-orthotopic injection of GL261 cells ( $5 \times 10^4$ ). The C57BL/6 mice treated with LOX inhibitor BAPN (2 g/L in drinking water) starting at 4 days post-orthotopic injection of GL261 cells. Representative mice **(K)** and quantification of tumor volume based on bioluminescence **(L)** are shown (n=6/group).

**(M)** Survival curves of C57BL/6 mice implanted with GL261 cells ( $5 \times 10^4$ ). Mice were treated with or without LOX inhibitor BAPN (2 g/L in drinking water) starting at 4 days post-orthotopic injection of GL261 cells (n=5 per group).

**(N, O)** *In vivo* bioluminescence-based images 45 days post-orthotopic injection of *PTEN*-OE U87 cells ( $5 \times 10^5$ ). The SCID mice treated with LOX inhibitor BAPN (2 g/L in drinking water) starting at



4 days post-orthotopic injection of cells. Representative mice (**N**) and quantification of tumor volume based on bioluminescence (**O**) are shown (n=5/group) at 45 days post-orthotopic injection of cells.

**(P)** Survival curves of SCID mice implanted with *Inf4a/Arf<sup>-/-</sup>EGFR<sup>viii</sup>* NSCs ( $5 \times 10^4$ ). Mice were treated with or without LOX inhibitor BAPN (2 g/L in drinking water) starting at 4 days postorthotopic injection of NSCs (n=5 per group).

Data from multiple replicates are presented as mean. Error bars indicate mean  $\pm$  SD. \*p<0.05, \*\*p<0.01, \*\*\*p<0.001, n.s., no significant difference, Student's t test. In (I), (J), (M) and (P), \*p<0.05, \*\*p<0.01, n.s., no significant difference, log-rank test.

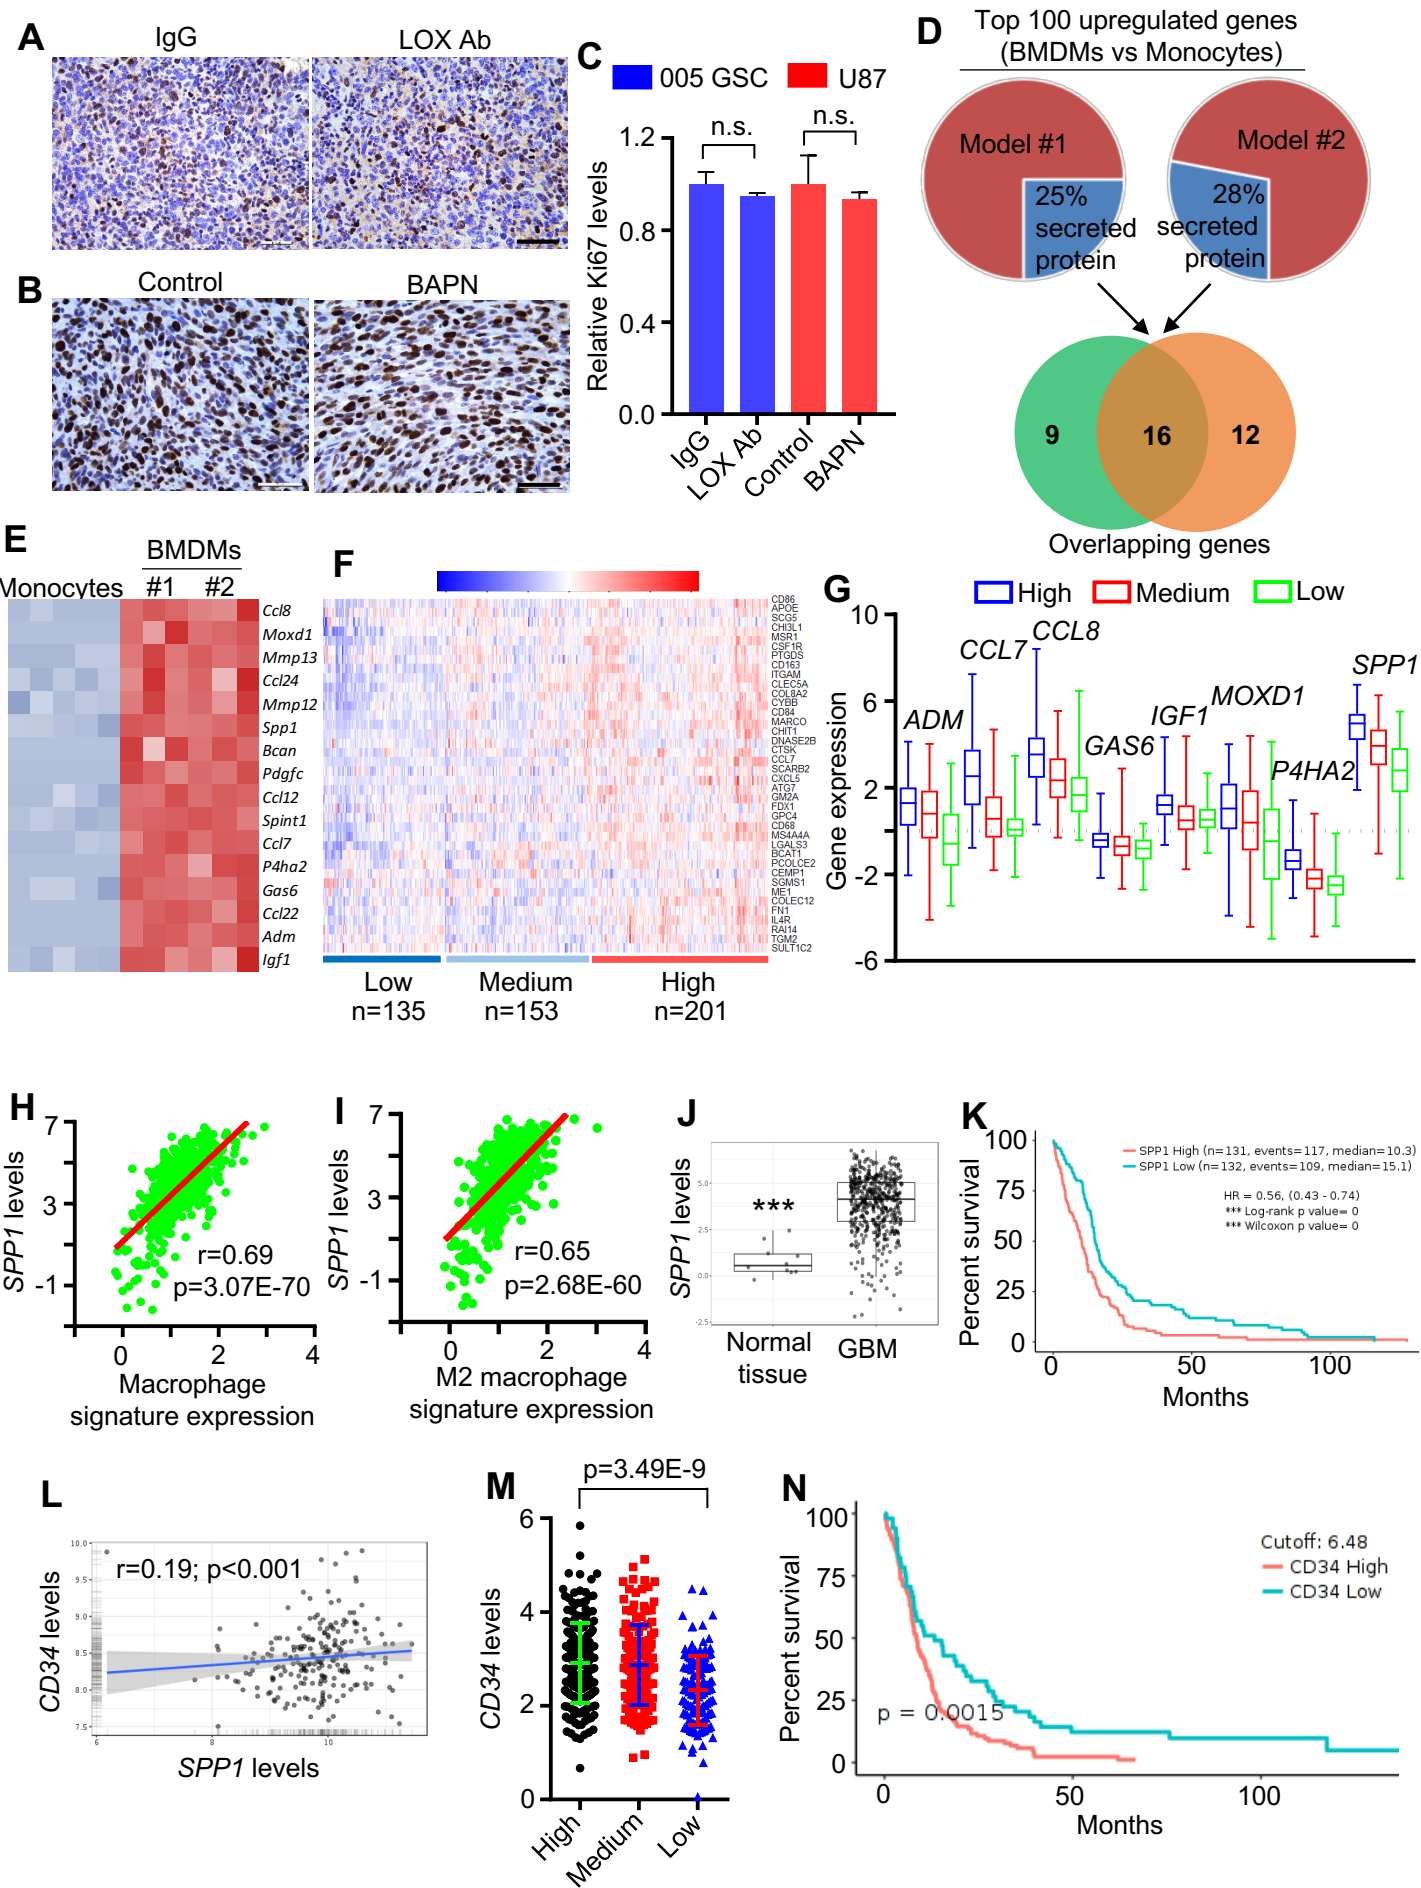

**Figure S6. LOX inhibition does not affect glioma cell proliferation and TAM-derived SPP1 promotes GBM progression and angiogenesis, related to Figure 6.**

**(A, B)** IHC for Ki67 in 005 GSC mouse tumors treated with LOX antibodies **(A)**, and in U87 tumors treated with LOX inhibitor BAPN **(B)**. Scale bars, 50  $\mu\text{m}$ .

**(C)** Quantification of relative Ki67 levels in 005 GSC mouse tumors treated with LOX antibodies and in U87 tumors treated with LOX inhibitor BAPN. n=3 biological replicates.

**(D,E)** The analysis of 16 common genes encoding secreted proteins from top 100 upregulated genes in glioma-associated BMDMs comparing to monocytes in two GBM mouse models (Bowman et al., 2016).

**(F)** Clustering of human TCGA GBM samples into Macrophage-high, -medium and -low groups using a 38-gene macrophages signature.

**(G)** The expression of *SPP1*, *P4HA2*, *MOXD1*, *IGF1*, *GAS6*, *CCL8*, *CCL7* and *ADM* in Macrophage-high, -medium and -low TCGA GBM patients.

**(H,I)** The correlation between total macrophage **(H)** and M2 macrophage **(I)** signatures and *SPP1* levels in TCGA GBM patients. r and p values are shown.

**(J)** The expression level of *SPP1* in normal brain tissues (n=10) and GBM tumor tissues (n=528) in TCGA GBM database.

**(K)** Kaplan-Meier survival curves of GBM patients relative to expression levels of *SPP1* in TCGA GBM database.

**(L)** The correlation between *SPP1* and *CD34* in patients of Rembrandt GBM database. r and p values are shown.

**(M)** The expression of *CD34* in Macrophage-high, -medium and -low TCGA GBM patients.

**(N)** Kaplan-Meier survival curves of GBM patients relative to expression levels of *CD34* in Gravendeel GBM database.

Data from multiple replicates are presented as mean. Error bars indicate mean  $\pm$  SD. \*\*\*p<0.001, n.s., no significant difference, Student's t test. In (H), (I) and (L), pearson's correlation test.

**A**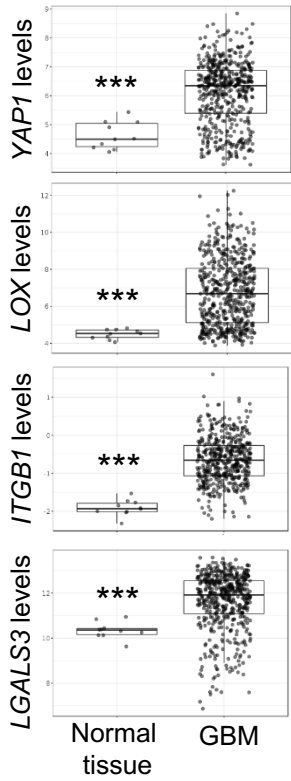**B**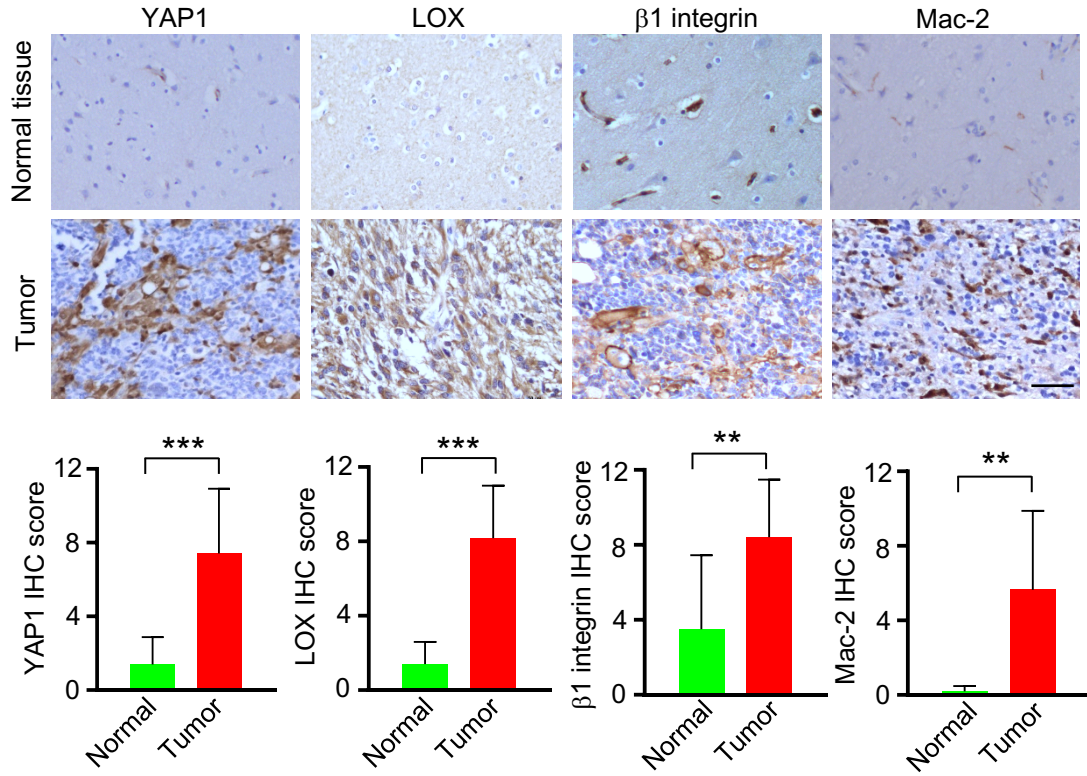**C**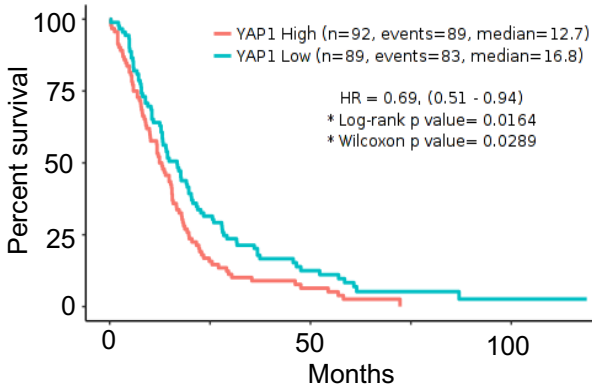**D**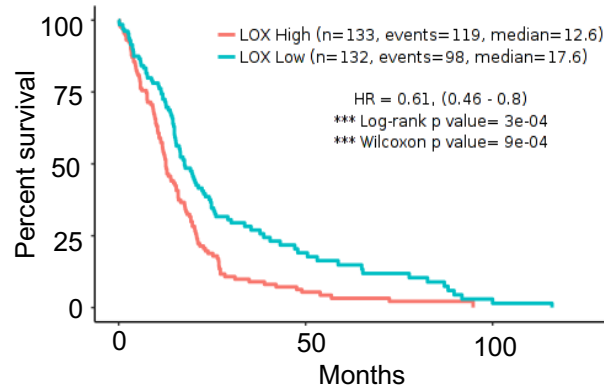**E**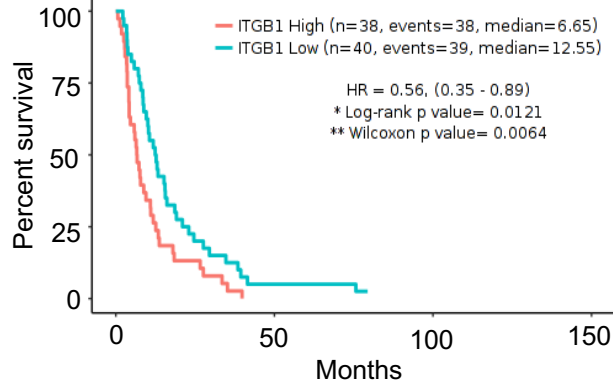**F**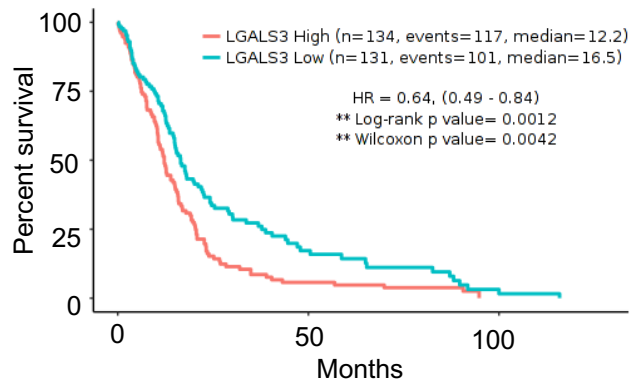

**Figure S7. YAP1-LOX- $\beta$ 1 integrin -macrophage axis in GBM progression, related to Figure 7.**

**(A)** The mRNA expression levels of *YAP1*, *LOX*, *ITGB1* and *LGALS3* in normal brain tissues (n=10) and GBM tumor tissues (n=528) in TCGA GBM database. \*\*\* $P < 0.001$  vs normal brain tissue, Student's t test.

**(B)** Immunohistochemistry (IHC) for YAP1, LOX,  $\beta$ 1 integrin and Mac-2 in human GBM tissue microarray which contains 5 normal brain tissues, 32 GBM and 3 anaplastic astrocytoma samples. The expression levels were quantified as the IHC score based on their expression level. Scale bar, 50  $\mu$ m. Error bars indicate mean  $\pm$  SD. \*\* $P < 0.01$ , \*\*\* $P < 0.001$ , Student's t test.

**(C-F)** Kaplan-Meier survival curves of GBM patients relative to expression levels of *YAP1* in Rembrandt GBM database (**C**), *LOX* in TCGA GBM database (**D**), *ITGB1* in Gravendeel GBM database (**E**), and *LGALS3* in TCGA GBM database (**F**).

**Table S5.** A list of primers used for RT-qPCR analysis, related to STAR Methods.

| <b>Gene name</b> | <b>Forward</b>           | <b>Reverse</b>          |
|------------------|--------------------------|-------------------------|
| <b>ACTB</b>      | CATGTACGTTGCTATCCAGGC    | CTCCTTAATGTACGCACGAT    |
| <b>ADM</b>       | ATGAAGCTGGTTTCCGTCG      | GACATCCGCAGTTCCTCTT     |
| <b>ARG1</b>      | TGGACAGACTAGGAATTGGCA    | CCAGTCCGTCAACATCAAACCT  |
| <b>BICC1</b>     | GGAAACAAATACGCAGATTGCTT  | CTTCAGTGTGACTCGATTGCTT  |
| <b>CCL5</b>      | TCTGCGCTCCTGCATCTG       | AGTGGGCGGGCAATGTAG      |
| <b>CCL22</b>     | ATCGCCTACAGACTGCACTC     | GACGGTAACGGACGTAATCAC   |
| <b>CKLF</b>      | CGGCTGGCACTAACTGTGA      | CGGTGACTTCAAATCCAGTGATA |
| <b>COL6A1</b>    | ACAGTGACGAGGTGGAGATCA    | GATAGCGCAGTCGGTGTAGG    |
| <b>CSF1</b>      | TGGCGAGCAGGAGTATCAC      | AGGTCTCCATCTGACTGTCAAT  |
| <b>CSF2</b>      | TCCTGAACCTGAGTAGAGACAC   | TGCTGCTTGTAGTGGCTGG     |
| <b>CTGF</b>      | CAAGGGCCTCTTCTGTGACT     | ACGTGCACTGGTACTTGCAG    |
| <b>CXCL5</b>     | AGCTGCGTTGCGTTTGTTCAC    | TGGCGAACACTTGCAGATTAC   |
| <b>DAB2</b>      | GTAGAAACAAGTGCAACCAATGG  | GCCTTTGAACCTTGCTAAGAGA  |
| <b>EMP2</b>      | ATTCACGACAAAAACGCGAAAT   | CAGTATCAGGTACATCATGCCG  |
| <b>FABP5</b>     | TGAAGGAGCTAGGAGTGGGAA    | TGCACCATCTGTAAAGTTGCAG  |
| <b>GAL</b>       | CCGGCCAAGGAAAAACGAG      | GAGGCCATTCTTGTGCGCTGA   |
| <b>GAPDH</b>     | GGAGCGAGATCCCTCCAAAT     | GGCTGTTGTCATACTTCTCATGG |
| <b>IFNG</b>      | GTCCAACGCAAAGCAATACA     | ATATTGCAGGCAGGACAACC    |
| <b>IGF2</b>      | GTGGCATCGTTGAGGAGTG      | CACGTCCCTCTCGGACTTG     |
| <b>IL4</b>       | CCAACTGCTTCCCCCTCTG      | TCTGTTACGGTCAACTCGGTG   |
| <b>IL6</b>       | ATTCTGCGCAGCTTTAAGGA     | ATCTGAGGTGCCCATGCTAC    |
| <b>IL13</b>      | CCTCATGGCGCTTTTGTGAC     | TCTGGTTCTGGGTGATGTTGA   |
| <b>LCN2</b>      | GACAACCAATTCCAGGGGAAG    | GCATACATCTTTTGCGGGTCT   |
| <b>LOX</b>       | CGGCGGAGGAAAACTGTCT      | TCGGCTGGGTAAGAAATCTGA   |
| <b>SEMA3E</b>    | GTTTGCTGGACTCTACAGTGAC   | CTTTCAACAGACGCTCATCGT   |
| <b>SERPINB2</b>  | CAGCACCGAAGACCAGATGG     | CCTGCAAAATCGCATCAGGATAA |
| <b>SERPINE2</b>  | TGGTGATGAGATACGGCGTAA    | GTTAGCCACTGTCACAATGTCTT |
| <b>SPP1</b>      | GAAGTTTCGCAGACCTGACAT    | GTATGCACCATTCAACTCCTCG  |
| <b>THBS1</b>     | AGACTCCGCATCGCAAAGG      | TCACCACGTTGTTGTCAAGGG   |
| <b>TNC</b>       | TCCAGTGTTCCGGTGGATCT     | TTGATGCGATGTGTGAAGACA   |
| <b>TNFA</b>      | CCTGTGAGGAGGACGAACAT     | GGTTGAGGGTGTCTGAAGGA    |
| <b>TSPAN3</b>    | GAGTGTCCCTCTTAGCTGCTG    | AGCTTCTTCACTACTAGAGCCTC |
| <b>VEGF</b>      | AGGGCAGAATCATCACGAAGT    | AGGGTCTCGATTGGATGGCA    |
| <b>VEGFC</b>     | GAGGAGCAGTTACGGTCTGTG    | TCCTTTCCTTAGCTGACACTTGT |
| <b>Actb</b>      | GGCTGTATTCCCCTCCATCG     | CCAGTTGGTAACAATGCCATGT  |
| <b>Adm</b>       | CACCCTGATGTTATTGGGTTCA   | CCACTTATTCCACTTCTTTCCGA |
| <b>Arg1</b>      | TTGGGTGGATGCTCACACTG     | GTACACGATGTCTTTGGCAGA   |
| <b>Ccl2</b>      | TTAAAAACCTGGATCGGAACCAA  | GCATTAGCTTCAGATTTACGGGT |
| <b>Ccl7</b>      | CCACATGCTGCTATGTCAAGA    | ACACCGACTACTGGTGATCCT   |
| <b>Ccl8</b>      | TCTACGCAGTGCTTCTTTGCC    | AAGGGGATCTTCAGCTTTAGTA  |
| <b>Ccl24</b>     | ATTCTGTGACCATCCCCTCAT    | TGTATGTGCCTCTGAACCCAC   |
| <b>Ccr2</b>      | ATCCACGGCATACTATCAACATC  | CAAGGCTCACCATCATCGTAG   |
| <b>Cd200r1</b>   | AGGCATTTCCAGTATCACAAGG   | CCAATGGCCGACAAAGTAAGG   |
| <b>Chil3</b>     | GTACAAGCTGGTCTGCTACTTC   | ATGTGCTAAGCATGTTGTCCG   |
| <b>Gas6</b>      | CCGCGCCTACCAAGTCTTC      | CGGGTTCGTTCTCGAACAC     |
| <b>Igf1</b>      | CACATCATGTGCTTTCACACC    | GGAAGCAACACTCATCCACAATG |
| <b>Il1b</b>      | GCAACTGTTCTGAACTCAACT    | ATCTTTTGGGGTCCGTCAACT   |
| <b>Il6</b>       | TAGTCCTTCCCTACCCCAATTTCC | TTGGTCTTAGCCACTCCTTC    |



|                     |                         |                         |
|---------------------|-------------------------|-------------------------|
| <b><i>Moxd1</i></b> | ACACACAGTGATCGAGTTTAGC  | CGGGATCGTCATGGTGGTA     |
| <b><i>Mrc1</i></b>  | CTCTGTTTCAGCTATTGGACGC  | CGGAATTTCTGGGATTCAGCTTC |
| <b><i>P4ha2</i></b> | CACCTCCATTGGGCACATGA    | GCTCTTAATCTTGGCGAGCTT   |
| <b><i>Pparg</i></b> | GGAAGACCACTCGCATTCTT    | GTAATCAGCAACCATTGGGTCA  |
| <b><i>Ptgs2</i></b> | TGAGCAACTATTCCAAACCAGC  | GCACGTAGTCTTCGATCACTATC |
| <b><i>Spp1</i></b>  | AGAGCGGTGAGTCTAAGGAGT   | TGCCCTTTCCGTTGTTGTCC    |
| <b><i>Tnfa</i></b>  | CCCTCACACTCAGATCATCTTCT | GCTACGACGTGGGCTACAG     |
